# Supplementary material for: UBE2T regulates FANCI monoubiquitination to promote NSCLC progression by activating EMT
Source: PubMed Central journal article supplement — Oncol Rep. 2022 Jun 14;48(2):139. doi: 10.3892/or.2022.8350 (PMC9245069; doi:10.3892/or.2022.8350), 2022-06-14

Figure S1. (A) Total FANCD2 was obtained from A549 and H1299 cells via IP. Compared with ubiquitin content of the control group, the enrichment of ubiquitin reduced upon downregulation of UBE2T expression and increased upon UBE2T overexpression. (B) Downregulation of *FANCD2* expression did not affect A549 and H1299 cell proliferation. (C) The survival curve of xenograft mice. FANCD2, Fanconi anemia complementation group D2; IP, immunoprecipitation; IB immunoblotting; UBE2T, ubiquitin-conjugating enzyme E2T; NS, not significant; NC, negative control; sh, short hairpin.

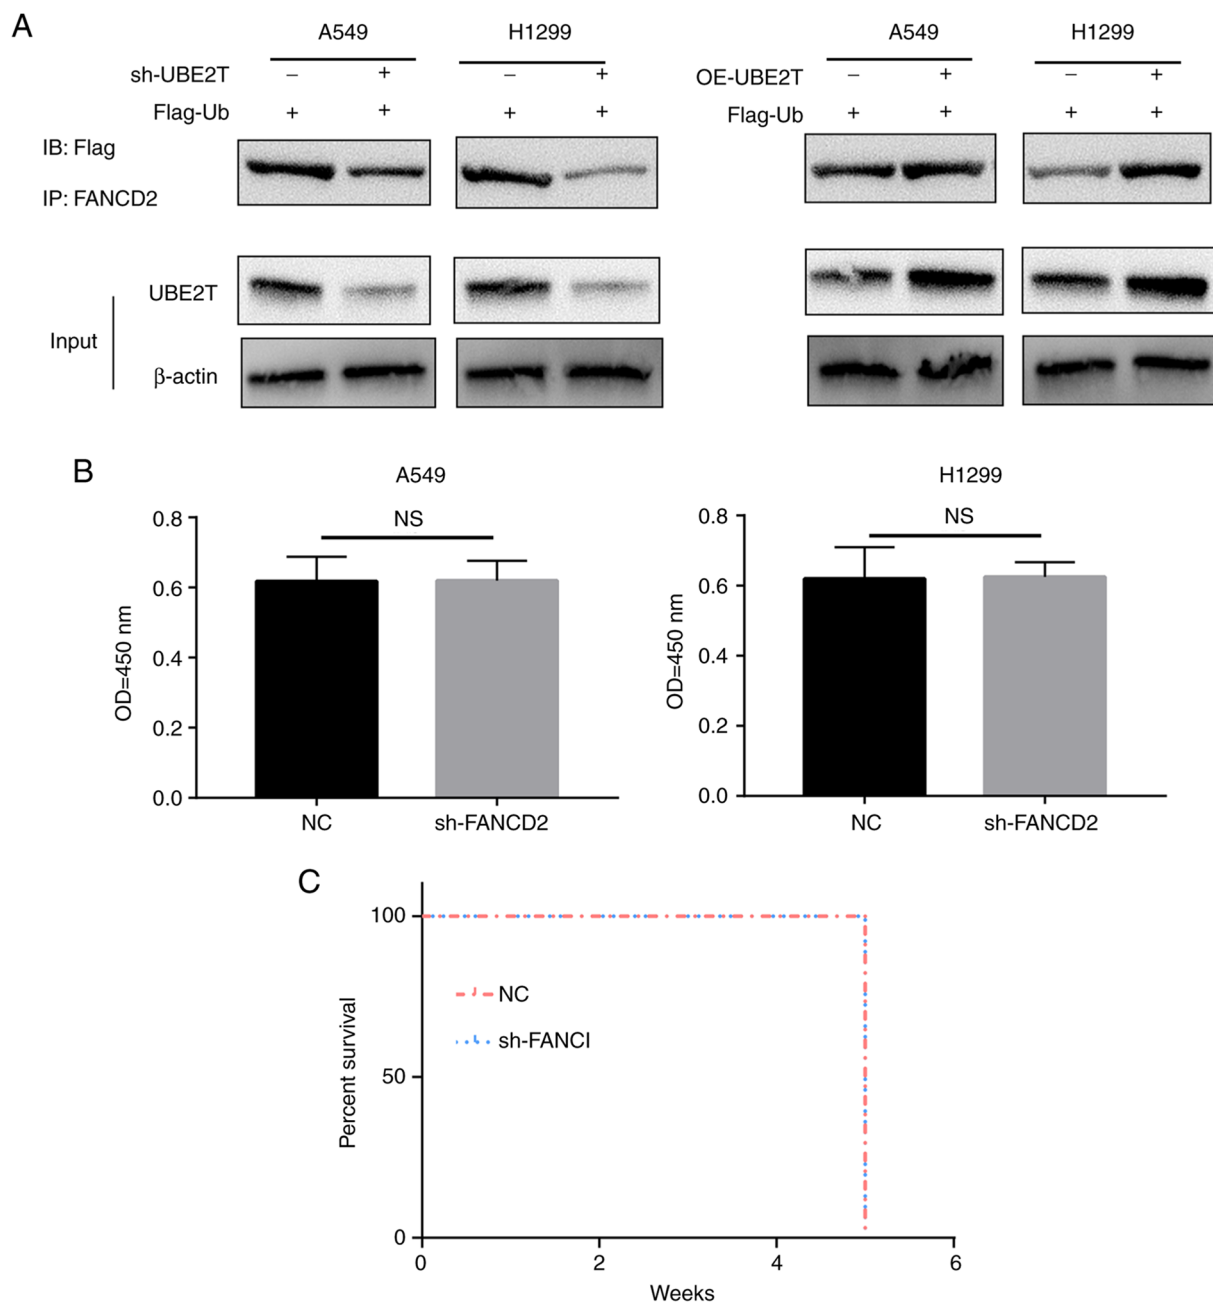

Figure S2. The transfection efficiency (mRNA and protein levels) of (A) sh-FANCI, (B) sh-UBE2T, (C) UBE2T and (D) WDR48. \*P<0.05. sh, short hairpin; FANCI, Fanconi anemia complementation group I; UBE2T, ubiquitin-conjugating enzyme E2T; UBE2T, ubiquitin-conjugating enzyme E2T; WB, western blotting; WDR48, WD repeat domain 48; NC, negative control.

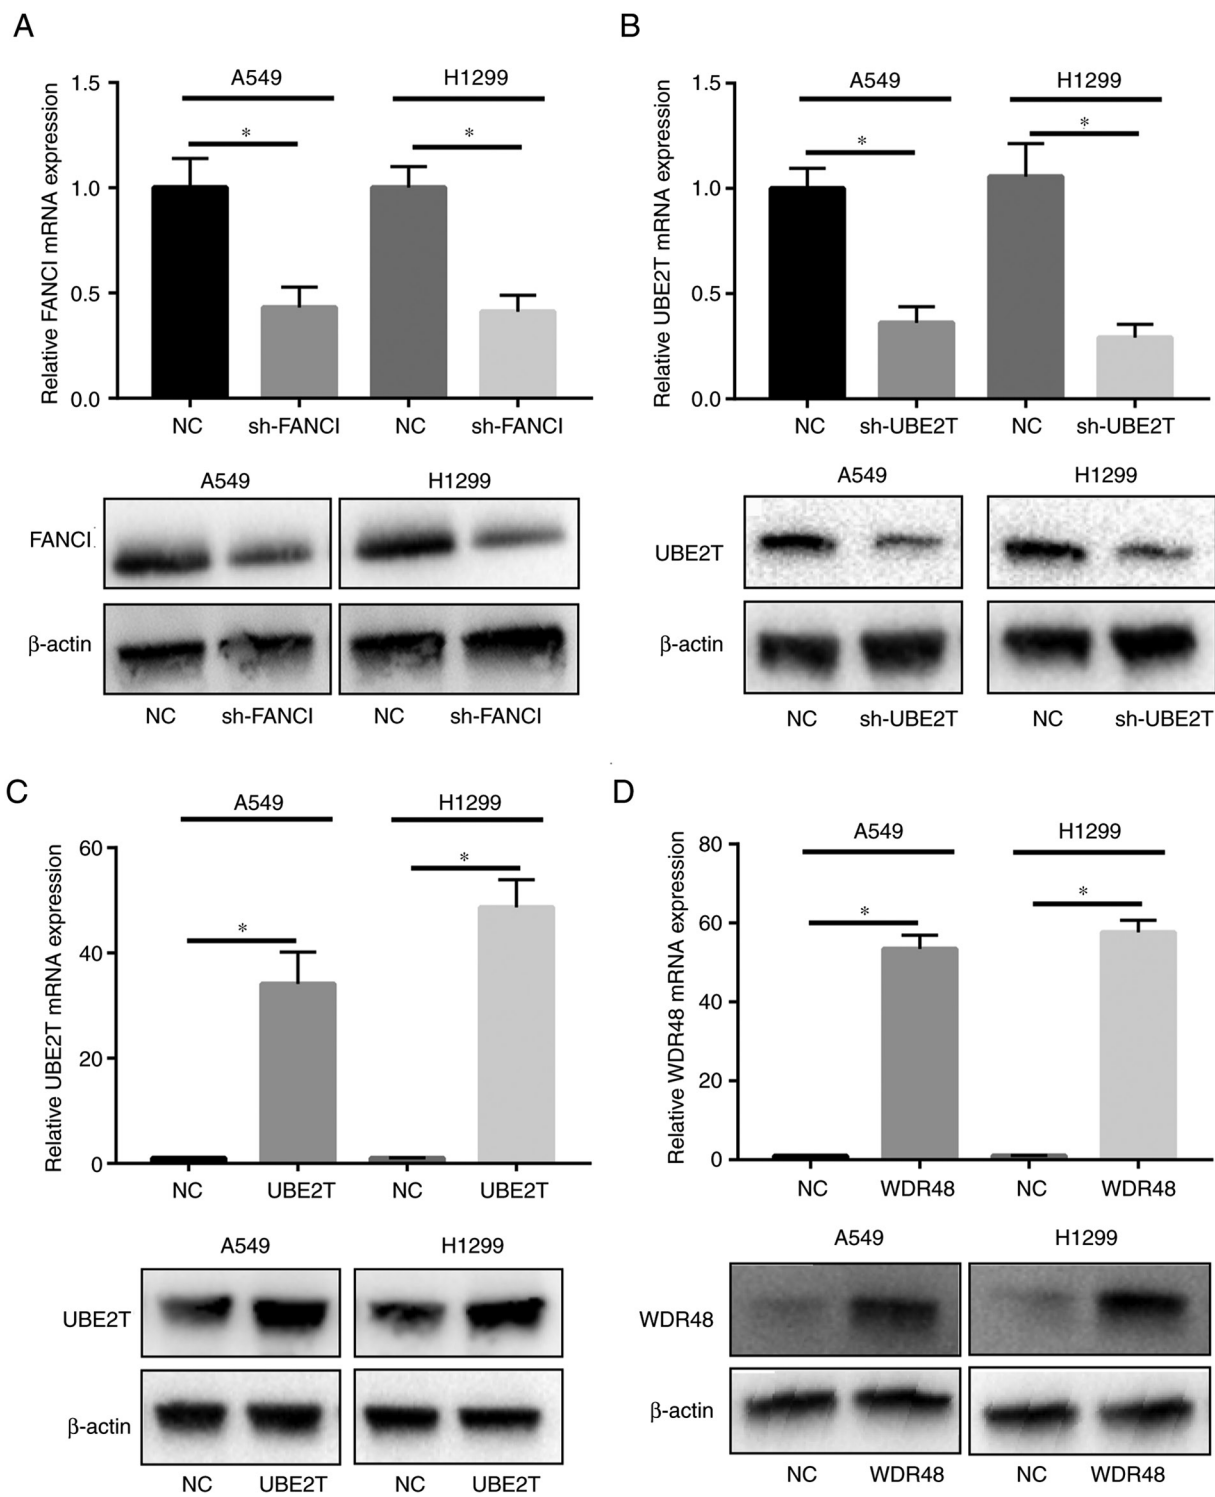

Supplement: Supplementary_Data.pdf [file Supplementary_Data.pdf]
